# Supplementary material
Source: PubMed Central journal article supplement (PMC8049517)
Supplement: NIHMS1674737-supplement-1.pdf [file NIHMS1674737-supplement-1.pdf]

## 1 A First-Generation Pediatric Cancer Dependency Map

2  
3 Neekesh V. Dharia<sup>1,2,3,4</sup>, Guillaume Kugener<sup>3,#</sup>, Lillian M. Guenther<sup>1,2,3,4</sup>, Clare F. Malone<sup>1,2,3,4</sup>,  
4 Adam D. Durbin<sup>1,2,3,4,\*</sup>, Andrew L. Hong<sup>1,2,3,4,@</sup>, Thomas P. Howard<sup>1,2,3,4,5</sup>, Pratiti  
5 Bandopadhyay<sup>1,2,3,4</sup>, Caroline S. Wechsler<sup>1,2,3,4</sup>, Iris Fung<sup>3</sup>, Allison C. Warren<sup>3</sup>, Joshua M.  
6 Dempster<sup>3</sup>, John M. Krill-Burger<sup>3</sup>, Brenton R. Paoella<sup>3</sup>, Phoebe Moh<sup>3,%</sup>, Nishant Jha<sup>3</sup>, Andrew  
7 Tang<sup>3</sup>, Philip Montgomery<sup>3</sup>, Jesse S. Boehm<sup>3</sup>, William C. Hahn<sup>3,4,5</sup>, Charles W. M. Roberts<sup>6</sup>,  
8 James M. McFarland<sup>3</sup>, Aviad Tsherniak<sup>3</sup>, Todd R. Golub<sup>1,2,3,4</sup>, Francisca Vazquez<sup>3,5,\$</sup>, Kimberly  
9 Stegmaier<sup>1,2,3,4,\$</sup>

## 10 11 Supplementary Note: Methods

### 12 13 Ewing sarcoma and neuroblastoma cells used for validation with MCL1 inhibitor

14 All cell lines were cultured at 37°C in a humidified atmosphere containing 5% CO<sub>2</sub>. KELLY,  
15 SKNAS, and SKNB2 lines were grown in Dulbecco's Modified Eagle's Media (DMEM) (Life  
16 Technologies) supplemented with 10% fetal bovine serum (FBS) (Sigma-Aldrich). EWS502 was  
17 grown in DMEM supplemented with 15% FBS; TC106 was grown in RPMI1640 (Sigma-Aldrich)  
18 with 10% FBSx; SKNMC was grown in Eagle's Minimum Essential Medium (EMEM) (ATCC)  
19 supplemented with 10% FBS. All cells were grown in the presence of 10 units/mL of penicillin, 10  
20 µg/mL streptomycin and 30 µg/mL of L-Glutamine, PSQ (Thermo Fisher Scientific). Cell lines  
21 were a kind gift from Todd Golub (Broad Institute, Cambridge MA). Cells were regularly tested for  
22 Mycoplasma by PCR (Sigma Aldrich). S63845, an MCL1 inhibitor, was obtained from Chemgood,  
23 LLC. Z-VAD-FMK, a pan-caspase inhibitor, was obtained from R&D Systems.

### 24 25 MCL1 CRISPR-Cas9 mediated disruption

26 Lentivirus was produced by transfecting HEK-293T cells with the lentiCRISPRv2 sgRNA vector  
27 (Addgene #52961), pCMV-VSV-G (Addgene #8454) and psPAX2 (Addgene #12260) as well as  
28 X-tremeGENE™ HP DNA Transfection Reagent (Roche) according to the manufacturer's  
29 instructions. CRISPR sgRNAs sequences for *MCL1* were obtained for lentiviral transduction, and  
30 Ewing sarcoma and neuroblastoma cells were incubated with 2 mL of virus and 8 mg/mL of  
31 polybrene (Sigma-Aldrich). Cells were selected in puromycin (Sigma-Aldrich) 48 hours post-  
32 transduction. Two to four days post-selection, cells were harvested for protein and viability  
33 assays. CRISPR guide sequences against *MCL1* were from the Achilles Project Avana library at  
34 the Broad Institute (<http://www.depmap.org>). LacZ control guide was designed not to cut  
35 anywhere in the human genome. sgLacZ sequence: AACGGCGGATTGACCGTAAT. Data were  
36 plotted using GraphPad Prism version 8.

### 37 38 MCL1 inhibitor and knockout viability studies

39 Cells were seeded onto 384-well tissue culture treated plates at a density of 25,000 cells/ml. The  
40 D300e digital dispenser (HP) was used to robotically plate drugs onto 384-well plates containing  
41 cells in two-fold dilutions, with four replicates per dose. For experiments involving the MCL-1  
42 inhibitor S63845, a maximum concentration of 10 µM and a minimum concentration of 20 nM  
43 were used, normalized with DMSO controls. After treatment, plated cells were analyzed for cell  
44 viability at four days using the CellTiter-Glo® luminescence assay (Promega) per the  
45 manufacturer's instructions. For experiments involving Z-VAD-FMK, a maximum dose of 50 µM  
46 and a minimum dose of 6.25 µM were used, with cells treated in 2-fold dilutions, with four  
47 replicates per dose, normalized with DMSO controls. Cells were incubated for one hour after  
48 application of Z-VAD-FMK, and then S63845 was added as above in a matrix to plates, with four  
49 replicates per combination of Z-VAD-FMK and S63845. After combination treatment, plated cells  
50 were analyzed for cell viability at three days using the CellTiter-Glo® luminescence assay  
51 (Promega) per the manufacturer's instructions.

52  
53 For *MCL1* knockout viability studies, eight replicates per CRISPR guide (sgRNA #1  
54 CCTCACGCCAGACTCCCGGA and sgRNA #2 GTTTGGCCTCAAAAGAAACG) were plated as  
55 above on to 384 well plates. Plates were analyzed at days two, four, six, and eight using the Cell-  
56 TiterGlo® luminescence assay (Promega) per the manufacturer's instructions.

57  
58 For all assays, luminescence was read on a Fluostar Omega Reader (BMG Labtech). IC50 values  
59 for S63845 were calculated from ATP luminescence measurements using log-transformed,  
60 normalized data in GraphPad Prism 8.0 (GraphPad Software, Inc.).

61  
62 Data were plotted using GraphPad Prism version 8.

### 63 64 **Western immunoblotting**

65 Western immunoblotting was performed for appropriate protein biomarkers of drug response  
66 (MCL1, PARP, Caspase 3, and Cleaved Caspase 3). Cells were lysed in Cell Signaling Lysis  
67 Buffer (Cell Signaling Technology) supplemented with Complete, EDTA free Protease Inhibitor  
68 Cocktail (Roche Diagnostics) and Phos-STOP Phosphatase Inhibitor (Roche Diagnostics).  
69 Protein concentrations were determined by the Bradford protein assay. Protein samples were  
70 separated by SDS-PAGE along with the Precision Plus Protein™ Kaleidoscope™ Prestained  
71 Protein Standard (Bio-Rad) and transferred to PVDF membranes. Membranes were incubated  
72 with primary antibodies directed against MCL1 (Cell Signaling Technology Cat. No. 94296S),  
73 PARP (Cell Signaling Technology Cat. No. 9542S), Caspase 3 (Cell Signaling Cat. No. 9662S),  
74 Cleaved Caspase 3 (Cell Signaling Technology Cat. No. 9664S) and Tubulin (Sigma Cat. No.  
75 T6199). All antibodies were used at a dilution of 1:1000. Horseradish peroxidase (HRP)  
76 conjugated secondary antibodies were used at a dilution of 1:4000. Blots were visualized by  
77 enhanced chemiluminescence (ThermoFisher Scientific).

78
